# Supplementary material
Source: PubMed Central journal article supplement (PMC8694052)
Supplement: pnas.2105646118.sapp.pdf [file pnas.2105646118.sapp.pdf]

1  
2  
3  
4  
5  
6  
7  
8  
9  
10  
11  
12  
13  
14  
15  
16  
17  
18  
19  
20  
21  
22  
23  
24  
25  
26  
27  
28  
29

**Supplementary Information for**  
The neural architecture of language:  
Integrative modeling converges on predictive processing

Martin Schrimpf, Idan Blank, Greta Tuckute, Carina Kauf, Eghbal A. Hosseini,  
Nancy Kanwisher, Joshua Tenenbaum, Evelina Fedorenko

Martin Schrimpf <msch@mit.edu>, Evelina Fedorenko <evelina9@mit.edu>

**This PDF file includes:**

- Supplementary text
- Figures S1 to S11
- Table S1

Code, data, models, and precomputed scores are available via [www.github.com/mschrimpf/neural-nlp](http://www.github.com/mschrimpf/neural-nlp)

# Supplement

30

## 31 SI-Methods

- 32 1. Neural dataset 1: fMRI (*Pereira2018*)
- 33 2. Neural dataset 2: ECoG (*Fedorenko2016*)
- 34 3. Neural dataset 3: fMRI (*Blank2014*)
- 35 4. Behavioral dataset: Self-paced reading (*Futrell2018*)
- 36 5. Computational models
- 37 6. Comparison of models to brain measurements
- 38 7. Estimation of ceiling
- 39 8. Language Modeling
- 40 9. Statistical tests

41 **Figure S1:** Ceiling estimates for neural and behavioral datasets

42 **Figure S2:** Scores generalize across metrics and layers

43 **Figure S3:** Brain surface visualization of model predictivity scores

44 **SI-1:** Language specificity

45 **SI-2:** Model performance on diverse language tasks vs. model-to-brain fit

46 **Figure S4:** Performance on next-word prediction selectively predicts model-to-brain fit

47 **Figure S5:** Model's neural predictivity for each dataset is correlated with behavioral predictivity

48 **Figure S6:** Performance on GLUE tasks does *not* predict model-to-behavior fit

49 **Figure S7:** Model architecture contributes to brain predictivity and untrained performance predicts trained performance

50 **Figure S8:** Controls for untrained models

51 **SI-3:** Effects of model architecture and training on neural and behavioral scores

52 **Figure S9:** Effects of model architecture and training on neural and behavioral scores

53 **Table S1:** Overview of model designs

54 **Figure S10:** Distribution of layer preference (best performing layer) per voxel for GPT2-xl for *Pereira2018*

55 **Figure S11:** Brain scores of each model's best, first, and last layer

56 **SI References**

57

## 58 SI-Methods

59 **1. Neural dataset 1: fMRI (Pereira2018).** We used the data from Pereira et al.'s (2018) Experiments 2 (n=9) and 3 (n=6) (10  
60 unique participants). (The set of participants is not identical to Pereira et al., 2018: i) one participant (tested at Princeton) was  
61 excluded from both experiments here to keep the fMRI scanner the same across participants; and ii) two participants who  
62 were excluded from Experiment 2 in Pereira et al., 2018, based on the decoding results in Experiment 1 of that study were  
63 included here, to err on the conservative side.) Stimuli for Experiment 2 consisted of 384 sentences (96 text passages, four  
64 sentences each), and stimuli for Experiment 3 consisted of 243 sentences (72 text passages, 3 or 4 sentences each). The two  
65 sets of materials were constructed independently, and each spanned a broad range of content areas. Sentences were 7-18  
66 words long in Experiment 2, and 5-20 words long in Experiment 3. The sentences were presented on the screen one at a time  
67 for 4s (followed by 4s of fixation, with additional 4s of fixation at the end of each passage), and each participant read each  
68 sentence three times, across independent scanning sessions (see Pereira et al., 2018 for details of experimental procedure  
69 and data acquisition).

70 *Preprocessing and response estimation:* Data preprocessing was carried out with SPM5 (using default parameters, unless  
71 specified otherwise) and supporting, custom MATLAB scripts. (Note that SPM was only used for preprocessing and basic  
72 modeling—aspects that have not changed much in later versions; for several datasets, we have directly compared the outputs  
73 of data preprocessed and modeled in SPM5 vs. SPM12, and the outputs were nearly identical.) Preprocessing included motion  
74 correction (realignment to the mean image of the first functional run using 2nd-degree b-spline interpolation), normalization  
75 (estimated for the mean image using trilinear interpolation), resampling into 2mm isotropic voxels, smoothing with a 4mm  
76 FWHM Gaussian filter and high-pass filtering at 200s. A standard mass univariate analysis was performed in SPM5 whereby a  
77 general linear model (GLM) estimated the response to each sentence in each run. These effects were modeled with a boxcar  
78 function convolved with the canonical Hemodynamic Response Function (HRF). The model also included first-order temporal  
79 derivatives of these effects (which were not used in the analyses), as well as nuisance regressors representing entire  
80 experimental runs and offline-estimated motion parameters.

81 *Functional localization:* Data analyses were performed on fMRI BOLD signals extracted from the bilateral fronto-temporal  
82 language network. This network was defined functionally in each participant using a well-validated language localizer task  
83 (Fedorenko et al., 2010), where participants read sentences vs. lists of nonwords. This contrast targets brain areas that  
84 support 'high-level' linguistic processing, past the perceptual (auditory/visual) analysis. Brain regions that this localizer  
85 identifies are robust to modality of presentation (e.g., Fedorenko et al., 2010; Scott et al., 2017), as well as materials and task  
86 (Diachek et al., 2020). Further, these regions have been shown to exhibit strong sensitivity to both lexico-semantic processing  
87 (understanding individual word meanings) and combinatorial, syntactic/semantic processing (putting words together into  
88 phrases and sentences) [1]–[7]. Following prior work, we used group-constrained, participant-specific functional localization  
89 (Fedorenko et al., 2010). Namely, individual activation maps for the target contrast (here, sentences>nonwords) were  
90 combined with "constraints" in the form of spatial 'masks'—corresponding to data-driven, large areas within which most  
91 participants in a large, independent sample show activation for the same contrast. The masks (available from  
92 <https://evlab.mit.edu/funcloc/> and used in many prior studies e.g., Jouravlev et al., 2019; Diachek et al., 2020; Shain et al.,  
93 2020) included six regions in each hemisphere: three in the frontal cortex (two in the inferior frontal gyrus, including its orbital  
94 portion: IFGorb, IFG; and one in the middle frontal gyrus: MFG), two in the anterior and posterior temporal cortex (AntTemp  
95 and PostTemp), and one in the angular gyrus (AngG). Within each mask, we selected 10% of most localizer-responsive voxels  
96 (voxels with the highest *t*-value for the localizer contrast) following the standard approach in prior work. This approach allows  
97 to pool data from the same functional regions across participants even when these regions do not align well spatially.  
98 Functional localization has been shown to be more sensitive and to have higher functional resolution (Nieto-Castanon &  
99 Fedorenko, 2012) than the traditional group-averaging approach (Holmes & Friston, 1998), which assumes voxel-wise  
100 correspondence across participants. This is to be expected given the well-established inter-individual differences in the  
101 mapping of function to anatomy, especially pronounced in the association cortex (e.g., Frost & Goebel, 2012; Tahmasebi et  
102 al., 2012; Vazquez-Rodriguez et al., 2019).

103 We constructed a stimulus-response matrix for each of the two experiments by i) averaging the BOLD responses to each  
104 sentence in each experiment across the three repetitions, resulting in 1 data point per sentence per language-responsive  
105 voxel of each participant, selected as described above (13,553 voxels total across the 10 participants; 1,355 average,  $\pm 6$  std.  
106 dev.), and ii) concatenating all sentences (384 in Experiment 2 and 243 in Experiment 3), yielding a 384x12,195 matrix for  
107 Experiment 2, and a 243x8,121 matrix for Experiment 3.

108 To examine differences in neural predictivity between the language network and other parts of the brain, we additionally  
109 extracted fMRI BOLD signals from two other networks: the multiple demand (MD) network (Duncan, 2010; Fedorenko et al.,  
110 2013) and the default mode network (DMN) (Buckner et al., 2008; Buckner & DiNicola, 2019). These networks were also  
111 defined functionally using well-validated localizer contrasts (Fedorenko et al., 2013; Mineroff et al., 2018) using a similar  
112 procedure as the one used for defining the language network: combining a set of ‘masks’ with individual activation maps, and  
113 selecting top 10% of most localizer-responsive voxels within each mask. Both networks were defined using a spatial working  
114 memory task (Fedorenko et al., 2011, 2013). For the MD network, we used the hard>easy contrast, and for the DMN network,  
115 we used the fixation>hard contrast. As for the language network, the MD and DMN masks were derived from large sets of  
116 participants for those contrasts, and are also available at <https://evlab.mit.edu/funcloc/>. The MD network and the DMN  
117 included 29,936 (2,994±230) and 10,978 (1,098±7) voxels, respectively.

118  
119 **2. Neural dataset 2: ECoG (Fedorenko2016).** We used the data from Fedorenko et al.’s (2016) study (n=5). (The set of  
120 participants includes one participant, S2, who was excluded from the main analyses in Fedorenko et al., 2016 due to a small  
121 number of electrodes of interest; because we here used only language-responsiveness as the criterion for electrode selection,  
122 this participant had enough electrodes to be included.) Stimuli consisted of 80 hand-constructed 8-word long semantically  
123 and syntactically diverse sentences and 80 lists of nonwords (as well as some other stimuli not used in the current study). For  
124 the critical analyses, we selected a set of 52 sentences that were presented to all participants. The materials were presented  
125 visually one word at a time (for 450 or 700 ms), and participants performed a memory probe task after each stimulus (see  
126 Fedorenko et al., 2016 for details of the experimental procedure and data acquisition).

127 *Preprocessing and response estimation:* We here provide only a brief summary, highlighting points of deviation from  
128 Fedorenko et al. (2016). The total numbers of implanted electrodes were 120, 128, 112, 134, and 98 for the five participants,  
129 respectively. Signals were digitized at 1200 Hz. Similar to Fedorenko et al. (2016), i) the recordings were high-pass filtered  
130 with a cut off frequency of 0.5 Hz; ii) reference, ground, and electrodes with high noise levels were removed, leaving 117,  
131 118, 92, 130, and 88 electrodes (for these analyses, we were more permissive with respect to noise levels compared to  
132 Fedorenko et al., 2016, to include as many electrodes in the analyses as possible; hence the numbers of analyzed electrodes  
133 are higher here than in the original study for 4 of the 5 participants); iii) spatially distributed noise common to all electrodes  
134 was removed using a common average reference spatial filter between electrodes with line noise smaller than a predefined  
135 threshold (electrodes connected to the same amplifier); and iv) a set of notch filters were used to remove the 60 Hz line noise  
136 and its harmonics. To extract the high gamma band activity—which has been shown to correspond to spiking neural activity  
137 in the vicinity of the electrodes [8]—we used a gaussian filter bank with centers at 73, 79.5, 87.8, 96.9, 107, 118.1, 130.4, and  
138 144 Hz, and standard deviations of 4.68, 4.92, 5.17, 5.43, 5.7, 5.99, 6.3, and 6.62 Hz, respectively. This approach differs from  
139 Fedorenko et al. (2016), where an IIR band-pass filter was used to select frequencies in the range of 70-170 Hz, and is likely  
140 more sensitive (Dichter et al. 2018). Finally, as in Fedorenko et al. (2016), the Hilbert transform was used to extract the analytic  
141 signal [9] (except here, the average of the Hilbert signal across the eight filters was used as high-gamma signal), z-scored for  
142 each electrode with respect to the activity throughout the experiment, and the signal envelopes were downsampled to 300  
143 Hz for further analysis (we did not additionally low-pass filter at 100 Hz, as in Fedorenko et al., 2016).

144 *Functional localization:* Mirroring the fMRI approach, where we focused on language-responsive voxels, data analyses were  
145 performed on signals extracted from language-responsive electrodes. These electrodes were defined in each participant using  
146 the same localizer contrast as in the fMRI datasets. In particular, we examined electrodes in which the envelope of the high  
147 gamma signal was significantly higher (at  $p<.01$ ) for trials of the sentence condition than the nonword-list condition (for  
148 details, see Fedorenko et al., 2016).

149 We constructed a stimulus-response matrix by i) averaging the z-scored high-gamma signal over the full presentation window  
150 of each word in each sentence, resulting in 8 data points per sentence per language-responsive electrode (97 electrodes total  
151 across the 5 participants; 47, 8, 9, 15, and 18 for participants S1 through S5, respectively), and ii) concatenating all words in  
152 all sentences (416 words across the 52 sentences), yielding a 416x97 matrix.

153 To examine differences in neural predictivity between language-responsive and other electrodes, we additionally extracted  
154 high gamma signals from a set of ‘stimulus-responsive’ electrodes. Stimulus-responsive electrodes were defined as electrodes

155 in which the envelope of the high gamma signal for the sentence condition was significantly different (at  $p < 0.05$  by a paired-  
156 samples  $t$ -test) from the activity during the inter-trial fixation interval preceding the trial. This selection procedure resulted  
157 in 67, 35, 20, 29, and 26 electrodes. As expected, this set of electrodes included many of the language-responsive electrodes;  
158 for the analysis in SI Appendix SI-4, we exclude the language-responsive electrodes leaving 105 stimulus- (but not language-)  
159 responsive electrodes.

160 **3. Neural dataset 3: fMRI (Blank2014).** We used the data from Blank et al. (2014) ( $n=5$ ). (The set of participants includes 5 of  
161 the 10 participants in Blank et al., 2014, because we wanted each participant to have been exposed to the same materials  
162 and as many stories as possible; the 5 participants included here all heard eight stories.) Stimuli consisted of stories from the  
163 publicly available Natural Stories Corpus (Futrell et al., 2018). These stories, adapted from existing texts (fairy tales and short  
164 stories) were designed to be “deceptively naturalistic”: they contained an over-representation of rare words and syntactic  
165 constructions embedded in otherwise natural linguistic context. The stories were presented auditorily (each was ~5 min in  
166 duration), and following each story, participants answered 6 comprehension questions (see Blank et al., 2014 for details of  
167 the experimental procedure, data acquisition, and preprocessing).

168 *Functional localization:* As in the Pereira2018 dataset, data analyses were performed on fMRI BOLD signals extracted from  
169 the language network. From each language-responsive voxel of each participant, the BOLD time-series for each story was  
170 extracted. Across the eight stories, the BOLD time-series included 1,317 time-points (TRs, time of repetition; TR=2s and  
171 corresponds to the time it takes to acquire the full set of slices through the brain). To align the neuroimaging data with the  
172 story text, we first split the text into consecutive 2-second intervals (corresponding to the fMRI TRs) based on the auditory  
173 recording; if a word straddled boundaries of intervals, it was assigned to the 2s interval in which that spoken word ended.  
174 Each of the resulting intervals thus included a story “fragment”, which could be a full short sentence, part of a longer sentence,  
175 or a transition between the end of one sentence and the beginning of another. Due to the temporal resolution of the HRF,  
176 whose peak’s latency is 4-6 seconds, we assumed that each time-point in the BOLD signal represented activity elicited by the  
177 text fragment that occurred 4s (i.e., 2 TRs) earlier.

178 We constructed a stimulus-response matrix by i) averaging the BOLD signals corresponding to each TR in each story across  
179 the voxels within each ROI of each participant (averaging across the voxels within ROIs was done to increase the signal-to-  
180 noise ratio), resulting in 1 data point per TR per language-responsive ROI of each participant (60 ROIs total across the 5  
181 participants), and ii) concatenating all story fragments (1,317 ‘stimuli’), yielding a 1,317x60 matrix.

182  
183 **4. Behavioral dataset: Self-paced reading (Futrell2018).** We used the data from Futrell et al. (2018) ( $n=179$ ). (The set of  
184 participants excludes 1 participant for whom data exclusions—see below—left only 6 data points or fewer.) Stimuli consisted  
185 of ten stories from the Natural Stories Corpus (same materials as those used in *Blank2014*, plus two additional stories), and  
186 any given participant read between 5 and all 10 stories. The stories were presented online (on Amazon’s Mechanical Turk  
187 platform) visually in a dashed moving window display—a standard approach in behavioral psycholinguistic research [10]. In  
188 this approach, participants press a button to reveal each consecutive word of the sentence or story; as they press the button  
189 again, the word they just saw gets converted to dashes again, and the next word is uncovered. The time between button  
190 presses provides an estimate of overall language comprehension difficulty, and has been shown to be robustly sensitive to  
191 both lexical and syntactic features of the stimuli (Grodner & Gibson, 2005; Smith & Levy, 2013, inter alia) (see Futrell et al.,  
192 2018 for details of the experimental procedure and data acquisition.) We followed data exclusion criteria in Futrell et al.  
193 (2018): for any given participant, we only included data for stories where they answered 5 or all 6 comprehension questions  
194 correctly, and we excluded reading times (RTs) that were shorter than 100 ms or longer than 3000 ms.

195  
196 We constructed a stimulus-response matrix by i) obtaining the RTs for each word in each story for each participant (848,762  
197 RTs total across the 179 participants; 338 average,  $\pm 173$  std. dev.), and ii) concatenating all words in all sentences (10,256  
198 words across 485 sentences), yielding a 10,256x179 matrix.

199  
200 **5. Computational models.** We tested 43 language models that were selected to sample a broad range of computational designs  
201 across three major types of architecture: embeddings, recurrent architectures, and attention-based ‘transformer’  
202 architectures. Here we provide a brief overview (see SI Appendix Table SI-10 for a summary of key features varying across the

203 models). **GloVe** [11] is a word embedding model where embeddings are positioned based on co-occurrence in the Common  
204 Crawl corpus; **ETM** (Dieng et al., 2019, 20ng dataset) combines word embeddings with an embedding of each word’s assigned  
205 topic; and **word2vec** [13]—abbreviated as w2v—provides embeddings which are trained to guess a word based on its context.  
206 **lm\_1b** [14] is a 2-layer long short-term memory (LSTM) model trained to predict the next word in the One Billion Word  
207 Benchmark [15]; and the **skip-thoughts** model [16] is trained to reconstruct surrounding sentences in a passage. For all 38  
208 transformer models (pretrained models from the HuggingFace library [17]), we only evaluate the encoder and not the  
209 decoder; the encoders process long contexts (100s of words) with a deep neural network stack of multiple attention heads  
210 that operate in a feed-forward manner (except the Transformer-XL-wt103 and the two XLNet models, which use recurrent  
211 processing), and differ mostly in the choice of directionality, network architecture, and training corpora (SI Appendix Table  
212 SI-11). We highlight key features of different classes of transformer models (BERT, RoBERTa, XLM, XLM-RoBERTa,  
213 Transformer-XL-wt103, XLNet, CTRL, T5, ALBERT, and GPT) in the order in which they appear in the bar-plots (e.g., Fig. 2a),  
214 except for the three ‘distilled’ models [18], which we mention in the end. **BERT** transformers [19] (n=4; bert-base-uncased,  
215 bert-base-multilingual-cased, bert-large-uncased, bert-large-uncased-whole-word-masking) are optimized to train  
216 bidirectional representations taking into account context both to the left and right of a masked token. **RoBERTa** transformers  
217 [20] (n=2; roberta-base, roberta-large) as a variation of BERT improve training hyper-parameters such as masking tokens  
218 dynamically instead of always masking the same token. **XLM** models [21] (n=7; xlm-mlm-enfr-1024, xlm-clm-enfr-1024, xlm-  
219 mlm-xnli15-1024, xlm-mlm-100-1280, xlm-mlm-en2048) learn cross-lingual models by predicting the next (“clm”) or a  
220 masked (“mlm”) token in a different language. **XLM-RoBERTa** [22] (n=2; xlm-roberta-base, xlm-roberta-large) combines  
221 RoBERTa masking with cross-lingual training in XLM. **Transformer-XL-wt103** [23] adds a recurrence mechanism to GPT (see  
222 below) and trains on the smaller WikiText-103 corpus. **XLNet** transformers [24] (n=2; xlnet-base-cased, xlnet-large-cased)  
223 permute tokens in a sentence to predict the next token. **CTRL** [25] adds control codes to GPT (see below) which influence text  
224 generation in a specific style. **T5** transformers [26] (n=5; t5-small, t5-base, t5-large, t5-3b, t5-11b) train the same model across  
225 a range of tasks including the prediction of multiple corrupted tokens, GLUE [27], and SuperGLUE [28] in a text-to-text manner  
226 where the task is provided as a text prefix. **AIBERT** transformers [29] (n=8; albert-base-v1, albert-large-v1, albert-xlarge-v1,  
227 albert-xxlarge-v1, albert-base-v2, albert-large-v2, albert-xlarge-v2, albert-xxlarge-v2) use parameter-sharing and model inter-  
228 sentence coherence. **GPT** transformers (n=5) are trained to predict the next token in a large dataset emphasizing document  
229 quality (openaigpt [30] on the Book Corpus dataset, gpt2, gpt2-medium, gpt2-large, and gpt2-xl [31] on WebText). Finally,  
230 **distilled versions** of models [18] (n=3; distilbert-base-uncased, distilgpt2, distilroberta-base) train compressed models on a  
231 larger teacher network.

232  
233 To retrieve model representations, we treated each model as an experimental participant (Figure 1) and ran the same  
234 experiment on it that was run on humans. Specifically, sentences were fed in sequentially into the model (for Pereira2018,  
235 Blank2014, and Futrell2018, sentences were grouped by topic / story to approximate the procedure with human participants).  
236 For embedding and recurrent models, sentences were fed in word-by-word; for transformers, the context before (but not  
237 after) each word was also fed into the models due to their lack of memory; the length of the context was determined by the  
238 models’ architectures. For recurrent models, the memory was reset after each story (*Pereira2018*, *Blank2014* and  
239 *Futrell2018*), or each sentence (*Fedorenko2016*).

240  
241 After the processing of each word, we retrieved (“recorded”) model representations at every computational block (e.g., one  
242 LSTM cell or one Transformer encoder block). (Word-by-word processing increases computational cost but is necessary to  
243 avoid bidirectional models, like the BERT transformers, seeing the future.) When comparing against human recordings  
244 spanning more than one word such as a sentence (*Pereira2018*) or story fragment (*Blank2014*), we aggregated model  
245 representations: for the embedding models, we used the mean of the word representations; for recurrent and transformer  
246 models, we used the representation of the last word since these models already aggregate representations of the preceding  
247 context, up to a maximum context length of 512 tokens.

248  
249 **6. Comparison of models to brain measurements.** We treated the model representation at each layer separately and tested  
250 how well it could predict human recordings (for *Pereira2018*, we treated the two experiments separately, but averaged the  
251 results across experiments for all plots except Fig. 2c). To generate predictions, we used 80% of the stimuli (sentences in  
252 *Pereira2018*, words in *Fedorenko2016* and *Futrell2018*, and story fragments in *Blank2014*; Fig. 1) to fit a linear regression  
253 from the corresponding 80% of model representations to the corresponding 80% of human recordings. We applied the

254 regression on model representations of the held-out 20% of stimuli to generate model predictions, which we then compared  
255 against the held-out 20% of human recordings with a Pearson correlation. This process was repeated five times, leaving out  
256 different 20% of stimuli each time, and we computed the per-voxel/electrode/ROI mean predictivity across those five splits.  
257 We aggregated these per-voxel/electrode/ROI scores by taking the median of scores for each participant's  
258 voxels/electrodes/ROIs and then computing the median and median absolute deviation (m.a.d.) across participants (over  
259 per-participant scores). Finally, this score was divided by the estimated ceiling value (see Estimation of ceiling below) to yield  
260 a final score in the range of [0, 1]. We report the results for the best-performing layer for each model (SI Appendix SI-12) but  
261 controlled for the generality of layer choices in train/test splits (SI Appendix Fig. S2b,c).

262 **7. Estimation of ceiling.** Due to intrinsic noise in biological measurements, we estimated a ceiling value to reflect how well  
263 the best possible model of an average human could perform. To do so, we first subsampled—for each dataset separately—  
264 the data with  $n$  recorded participants into all possible combinations of  $s$  participants for all  $s \in [2, n]$  (e.g. {2, 3, 4, 5} for  
265 *Fedorenko2016* with  $n=5$  participants). For each subsample  $s$ , we then designated a random participant as the target that we  
266 attempt to predict from the remaining  $s - 1$  participants (e.g., predict 1 subject from 1 (other) subject, 1 from 2 subjects, ...,  
267 1 from 4, to obtain a mean score for each voxel/electrode/ROI in that subsample. To extrapolate to infinitely many humans  
268 and thus to obtain the highest possible (most conservative) estimate, we fit the equation  $v = v_0 \times \left(1 - e^{-\frac{x}{\tau_0}}\right)$  where  $x$  is  
269 each subsample's number of participants,  $v$  is each subsample's correlation score and  $v_0$  and  $\tau_0$  are the fitted parameters for  
270 asymptote and slope respectively. This fitting was performed for each voxel/electrode/ROI independently with 100  
271 bootstraps each to estimate the variance where each bootstrap draws  $x$  and  $v$  with replacement. The final ceiling value was  
272 the median of the per-voxel/electrode/ROI ceilings  $v_0$ .

273 For *Fedorenko2016*, a ceiling was estimated for each electrode in each participant, so each electrode's raw value was divided  
274 by its own ceiling value. Similarly, for *Blank2014*, a ceiling was estimated for each ROI in each participant, so each ROI's raw  
275 value was divided by its own ceiling value. For *Pereira2018*, we treated the two experiments separately, focusing on the 5  
276 participants that completed both experiments to obtain full overlap in the materials for each participant, and used 10 random  
277 sub-samples to keep the computational cost manageable. A ceiling was estimated for all voxels in the 5 participants who  
278 participated in both experiments. Each voxel's raw predictivity value was divided by the average ceiling estimate (across all  
279 the voxels for which it was estimated). For *Futrell2018*, given the large number of participants and because most participants  
280 only had measurements for a subset of the stimuli, we did not hold out one participant but rather tested how well the mean  
281 RTs for one half of the participants predicted the RTs for the other half of participants. We further took 5 random subsamples  
282 at every 5 participants, starting from 1, and built 3 random split-halves, again to keep computational cost manageable. A  
283 ceiling was estimated for each participant, and each participant's raw values were divided by this ceiling. (Note that this  
284 approach is even more conservative than the leave-one-out approach, because split-half correlations tend to be higher than  
285 one-vs.-rest, due to a reduction in noise when averaging (for each half).)  
286

287 **8. Language Modeling.** To assess the models' performance on the normative next-word-prediction task, we used a dataset  
288 of 720 Wikipedia articles, WikiText-2 [32], with 2M training, 218k validation, and 246k test tokens (words and word-parts).  
289 These tokens were processed by model-specific tokenization with a maximum vocabulary size of 250k, selected based on  
290 the tokens' frequency in the model's original training dataset, and split up into blocks of 32 tokens each (both the vocabulary  
291 size and the length of blocks were constrained by computational cost limitations). We sequentially fed the tokens into  
292 models as explained in Methods 5 (Computational Models) and captured representations at each step from each model's  
293 final layer (penultimate layer before the classifier if the model has a readout). To predict the next word, we fit a linear  
294 decoder from those representations to the next token over words in the vocabulary ( $n=50k$ ), on the training tokens. This

295 decoder is trained with a cross-entropy-loss  $L = -\sum_c t_c^i \log\left(\frac{e^{s_c^i}}{\sum_d e^{s_d^i}}\right)$  where  $t_c^i$  is the true label for class  $c$  and sample  $i$ , and

296  $s_c^i$  is the predicted probability of that class; the linear weights are updated with AdamW and a learning rate of  $5e-5$  in batches  
297 of 4 blocks until convergence as defined on the validation set. Importantly, note that we only trained weights of a readout  
298 decoder, *not* the weights of models themselves, in order to maintain the same model representations that we used in model-  
299 to-brain and model-to-behavior comparisons. The final language modeling score is reported for each model as the  
300 perplexity, i.e. the exponent of the cross-entropy loss, on the held-out test set. We ensured that our pipeline could  
301 reproduce the lower perplexity values in e.g. [31] by fine-tuning the entire model and increasing the batch size. To be able

302 to test all models under the same conditions and with fixed representations that were used for brain prediction, we however  
303 had to use a lower batch size and only train a linear readout without fine-tuning which leads to the lower perplexity scores  
304 reported in Fig. 3. T5-11b is not part of this analysis because of lack of computational resources to run the model.

305

306 **9. Statistical tests.** As a primary metric, model-to-brain predictivity scores are reported as the Pearson correlation coefficient  
307 (denoted by “ $r$ ”). These correlation scores were obtained from aggregating over individual per-voxel/electrode/ROI scores.  
308 To avoid the assumption that the neural scores are Gaussian distributed, we aggregated these per-voxel/electrode/ROI scores  
309 by taking the *median* of scores for each participant’s voxels/electrodes/ROIs and then computing the median and median  
310 absolute deviation (m.a.d.) across participants.

311 In addition to reporting an aggregated score across datasets, we show individual scores per dataset (visualized as bar plot  
312 insets). To obtain an error estimate for the correlation scores, we report the bootstrapped correlation coefficient, as  
313 computed by leaving out 10% of the scores and computing the  $r$ -value on the remaining 90% held-out scores (over 1,000  
314 iterations).

315 All  $p$ -values less than 0.05 are summarized with one asterisk,  $p$ -values less than 0.005 with two asterisks,  $p$ -values less than  
316 0.0005 with three asterisks, and  $p$ -values less than 0.00005 are denoted by four asterisks.

317 For interaction tests, we used two-sided  $t$ -tests with 1,000 bootstraps and 90% of samples per bootstrap.



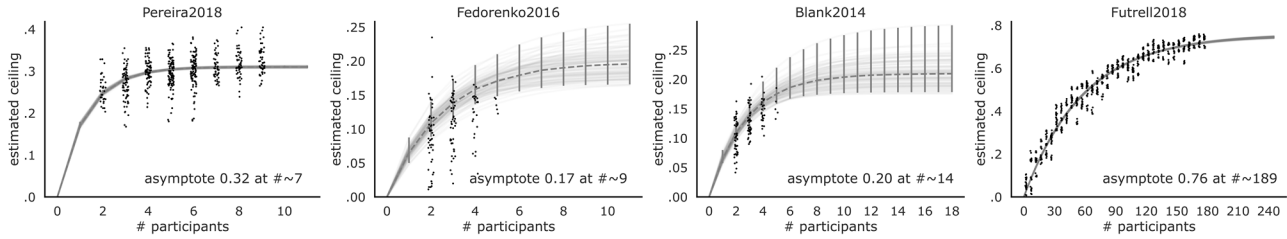

318

319

320

321

322

323

324

325

326

327

328

329

330

**Figure S1: Ceiling estimates for neural and behavioral datasets.** Due to intrinsic noise in biological measurements, we estimated a ceiling value to reflect how well the best possible model of an average human could perform, based on sub-samples of the total set of participants (see [Methods-7](#)). For each sub-sample,  $s - 1$  participants are used to predict a held-out participant (except in *Futrell2018*, where this is done on split-halves, as described in the text). Each dot represents a correlation between the average scores of the  $s - 1$  participants and the left-out participant for a random sub-sample of the number of participants  $s$  indicated on the x-axis. We then bootstrapped 100 random combinations of those dots to extrapolate (gray lines) the highest possible ceiling if we had an infinite number of participants at our disposal. The parameters of these bootstraps are then aggregated by taking the median to compute an overall estimated ceiling (dashed gray line with 95% CI in error-bars). We use this estimated ceiling to normalize model scores and here also report the number of participants at which the estimated ceiling would be met (which show that for *Pereira2018* and *Futrell2018*, the number of participants we have is at and close to the asymptote value, respectively). Ceiling levels are .32 (*Pereira2018*), .17 (*Fedorenko2016*), .20 (*Blank2014*), and .76 (*Futrell2018*).

331

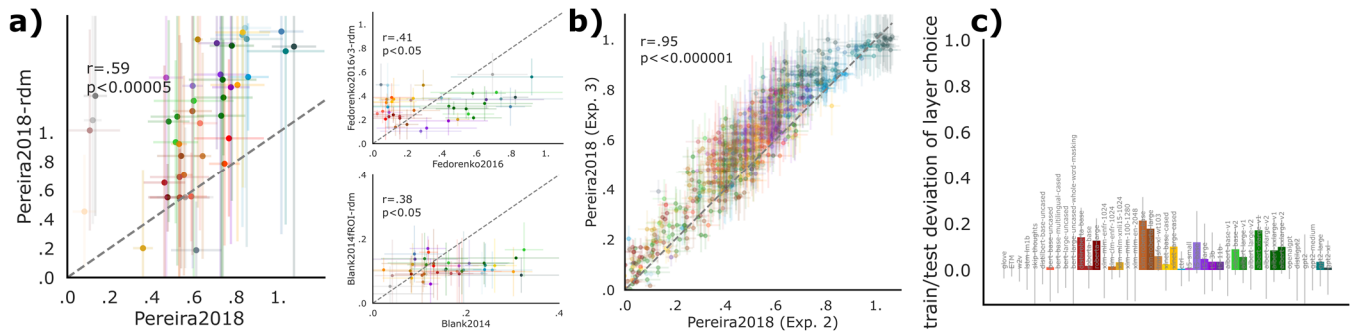

332

333 **Figure S2: Scores generalize across metrics and layers. a)** Model scores on each dataset generalize across different choices  
 334 of a similarity metric; here we plot the predictivity metric used in the manuscript on the x-axis against a model-to-brain  
 335 similarity metric based on representational dissimilarity matrices (RDMs) between models and neural representations on the  
 336 y-axis. Like in the predictivity metric, stimuli along with corresponding model activations and brain recordings were split 5-  
 337 fold but we then only compared the respective test splits given that the RDM metric does not employ fitting. Specifically, we  
 338 followed [33] and computed the RDM for each model’s activations, and a separate RDM for each brain recording dataset,  
 339 based on 1 minus the Pearson correlation coefficient between pairs of stimuli; then, we measured model-brain similarity via  
 340 Spearman correlation across the two RDMs’ upper triangles. The RDM score for one model on one human dataset is then the  
 341 mean over splits. We ran each model and compared resulting scores with the primarily used scores from the predictivity  
 342 metric. Correlations for models’ scores between the predictivity and the RDM metrics are: Pereira2018  $r=.57$ ,  $p<0.0001$ ;  
 343 Fedorenko2016  $r=.40$ ,  $p<.01$ ; Blank2014  $r=.38$ ,  $p<.05$ . **b)** Model scores per layer generalize across dataset splits; for every  
 344 layer in each model we plot its brain score (using the predictivity metric) on two experimental splits (experiment 2 and 3) of  
 345 the *Pereira2018* dataset. Scores are very strongly correlated ( $r=.95$ ,  $p<<0.000001$ ), indicating that choosing a model’s layer  
 346 on a separate dataset split will generalize to a held-out test split. **c)** Choice of layer generalizes across dataset splits; for each  
 347 model we plot the difference between its score on *Pereira2018* experiment 3 when choosing the layer on experiment 3  
 348 directly (i.e. the max due to layer choice on “test set”) and its score on experiment 3 when choosing the layer on experiment  
 349 2 (choice on “train set”). The layer is chosen based on the model’s maximum score across layers on the respective dataset  
 350 split. Deviations between choosing the layer on a train or test set are minimal with error bars overlapping 0, indicating that  
 351 there is no substantial difference between the two choices.

352

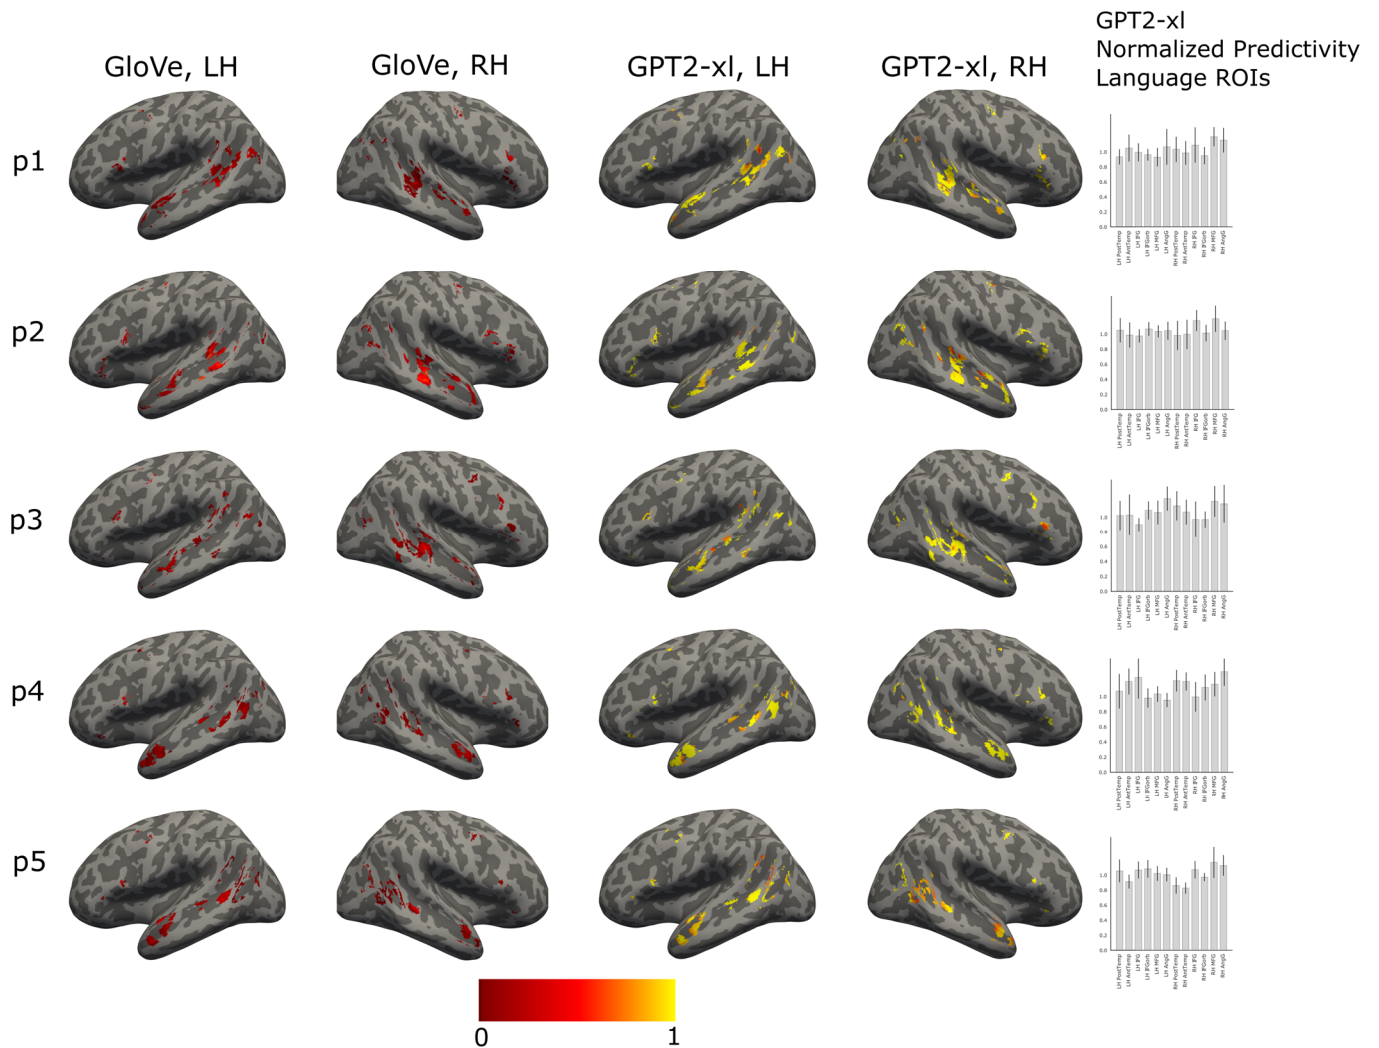

353

354 Figure S3: **Brain surface visualization of model predictivity scores.** Plots show surface projections of volumetric individual  
 355 language-responsive functional ROIs in the left and right hemispheres (LH and RH) for five representative participants from  
 356 *Pereira2018*. In each voxel of each fROI, we show a normalized predictivity value for two models that differ substantially in  
 357 their ability to predict human data: GloVe (first two columns) and GPT2-xl (second two columns; for GPT2-xl, we show  
 358 predictivity values from the overall best-performing layer, in line with how we report the results in the main text). (Note that  
 359 the voxel locations are identical between GloVe and GPT2-xl, and are determined by an independent functional language  
 360 localizer as described in the text; we here illustrate the differences in predictivity values, along with showing sample fROIs  
 361 used in our analyses). Predictivity values were ceiling-normalized for each participant and each of 12 ROIs separately (a slight  
 362 deviation from the approach in the main analysis, which was designed to control for between-region differences in reliability).  
 363 The data were analyzed in the volume space and co-registered using SPM12 to Freesurfer's standard brain CVS35 (combined  
 364 volumetric and surface-based (CVS)) in the MNI152 space using nearest neighbor interpolation and no smoothing. The ceiled  
 365 predictivity maps for the language localizer contrast (10% of most language-responsive voxels in each 'mask'; [Methods-1](#))  
 366 were projected onto the cortical surface using `mri_vol2surf` in Freesurfer v6.0.0 with a projection fraction of 1. The surface  
 367 projections were visualized on an inflated brain in the MNI152 space using the developer version of Freeview (assembly March  
 368 10th, 2020). The bar plots in the rightmost column show the normalized predictivity values per ROI (median across voxels) in  
 369 the language network for GPT2-xl. Error bars denote m.a.d. across voxels. The distribution of predictivity values across the  
 370 language-responsive voxels, and the similar predictivity magnitudes across the ROIs in the bar graphs, both suggest that the  
 371 results (between-model differences in neural scores) are not driven by one particular region of the language network, but are  
 372 similar across regions, and between the LH and RH components of the network (see also SI-4).

373

#### 374 SI-1 – Language specificity

375 In the analyses reported in the manuscript, we focused on the language-responsive regions / electrodes. Here, for two  
376 datasets, we investigated the model-brain relationship outside the language network in order to assess the spatial specificity  
377 of our results, i.e., to test whether they obtain only, or more strongly, in the language network compared to other parts of  
378 the brain. For both datasets, we report analyses based on *raw predictivity values*, without normalizing by the estimated noise  
379 ceiling because the brain regions of the language network differ from other parts of the brain in how strongly their activity is  
380 tied to stimulus properties during comprehension (e.g., I. A. Blank & Fedorenko, 2017, 2020; Diachek et al., 2020; Shain et al.,  
381 2020; Wehbe et al., 2020). This variability is important to take into account when comparing between functionally different  
382 brain regions/electrodes because we are interested in how well the models explain linguistic-stimulus-related neural activity.  
383 When we normalize the neural responses of a non-language-responsive region/electrode using a language comprehension  
384 task, we're effectively isolating whatever little *stimulus-related activity* this region/electrode may exhibit, putting them on  
385 ~equal or similar footing with the language-responsive regions/electrodes. (For completeness and ease of comparison with  
386 the main analyses, we also report analyses based on normalized predictivity values.)  
387

388 **Fedorenko2016:** The scores obtained from language-responsive electrodes were compared to those obtained from stimulus-  
389 responsive electrodes, excluding the language-responsive ones (see Methods-2), for all 43 models. The number of language-  
390 responsive electrodes across five participants was 97, and the number of stimulus-, but not language-, responsive electrodes  
391 across the participants was comparable (n=105). The analysis was identical to the main analysis (see Methods), besides  
392 omitting the ceiling normalization for the raw predictivity analyses. As described in Methods, normalization was performed  
393 for each electrode in each participant separately.

394 For raw predictivity, neural responses in the language-responsive electrodes were predicted 49.21% better on average across  
395 models than the non-language-responsive electrodes (independent-samples two-tailed t-test:  $t=3.4$ ,  $p=0.001$ ). (For  
396 normalized predictivity, neural responses in the language-responsive electrodes were predicted 59.26% better on average  
397 across models than the non-language-responsive electrodes ( $t=2.24$ ,  $p=0.03$ ).)  
398

399 **Pereira2018:** The scores obtained from the language network were compared to those obtained from two control networks:  
400 the multiple demand (MD) network and the default mode network (DMN) (see Methods), for all 43 models. The number of  
401 voxels in the language network across participants was, on average, 1,355 ( $\pm 7$  SD across participants), and the average  
402 number of voxels in the MD network and the DMN was comparable (MD:  $2,994\pm 230$ ; DMN:  $1,098\pm 7$ ). The analysis was  
403 identical to the main analysis (see Methods), besides omitting the ceiling normalization for the raw predictivity analyses. For  
404 the normalized predictivity analyses, the network predictivity values were normalized by their respective network ceiling  
405 values.

406 For raw predictivity, neural responses in the language network ROIs were predicted 16.96% better on average across models  
407 than the MD network ROIs (independent-samples two-tailed t-test:  $t=2.26$ ,  $p=0.03$ ) and numerically (14.33%) better than the  
408 DMN ROIs ( $t=1.78$ ,  $p=0.08$ ). (For normalized predictivity, neural responses in the language network ROIs were predicted  
409 numerically (6.47%) worse on average than the MD network ROIs ( $t=-0.92$ ,  $p=0.36$ ) and also numerically (1.05%) worse than  
410 the DMN ROIs ( $t=-0.31$ ,  $p=0.76$ ).)  
411

412 These results suggest that—when allowing for inter-regional differences in the reliability of language-related responses—the  
413 model-to-brain relationship is stronger in the language-responsive regions/electrodes. However, we leave open the possibility  
414 that language models also explain neural responses outside the boundaries of the language network, perhaps because these  
415 models capture some parts of our general semantic knowledge, which is plausibly stored in a distributed fashion across the  
416 brain. For example, several earlier studies used simple embedding models to decode linguistic meaning from fMRI data (e.g.,  
417 Wehbe et al., 2014; Huth et al., 2016; Anderson et al., 2017; Pereira et al., 2018) and reported reliable decoding not only  
418 within the language network, but also across other parts of association cortex. Given that we know that different large-scale  
419 cortical networks differ functionally in important ways (e.g., see Fedorenko & Blank, 2020, for a recent discussion of the  
420 language vs. MD networks), it will be important to investigate in future work the precise mapping between the language  
421 models' representations and neural responses in these different functional networks.  
422

## 423 **SI-2 – Model performance on diverse language tasks vs. model-to-brain fit**

424 To test whether the next-word prediction task is special in predicting model-to-brain fit, we used the *Pereira2018* dataset to  
425 examine the relationship between the models' performance on diverse language processing tasks from the General Language  
426 Understanding Evaluation (GLUE) benchmarks (Wang et al., 2018) and neural predictivity. We used a subset of the high-  
427 performing, transformer models (n=30 of the 38 where we could find published commitments of which features to use for  
428 GLUE). The GLUE benchmark encompasses nine tasks that can be classified into three categories: single-sentence judgment  
429 tasks (n=2), sentence-pair semantic similarity judgment tasks (n=3), and sentence-pair inference tasks (n=4). The two single-  
430 sentence tasks are both binary classification tasks: models are asked to determine whether a given sentence is grammatical  
431 or ungrammatical (Corpus of Linguistic Acceptability, *CoLA* (Warstadt et al., 2018)), or whether the sentiment of a sentence  
432 is positive or negative (Stanford Sentiment Treebank, *SST-2* (Socher et al., 2013)). In the semantic similarity tasks, models are  
433 asked to assert or deny the semantic equivalence of question pairs (Quora Question Pairs, *QQP* (Chen et al., 2018)) or sentence  
434 pairs (Microsoft Research Paraphrase Corpus, *MRPC* (Dolan & Brockett, 2005)), or to judge the degree of semantic similarity  
435 between two sentences on a scale of 1-5 (Semantic Textual Similarity Benchmark, *STS-B* (Cer et al., 2017)). Lastly, the  
436 benchmark contains four inference tasks, of which we include three (following Devlin et al., 2018), we exclude the Winograd  
437 Natural Language Inference, *WNLI*, task; see (12) in <https://gluebenchmark.com/faq>). In two of these tasks, models are asked  
438 to determine the entailment relationship between sentences in a pair using either tertiary classification: entailment,  
439 contradiction, neutral (Multi-Genre Natural Language Inference corpus, *MNLI* (Williams et al., 2018)), or binary classification:  
440 entailment or no entailment (Recognizing Textual Entailment, *RTE* (Dagan et al., 2006, Bar Haim et al., 2006, Giampiccolo et  
441 al., 2007, Bentivogli et al., 2009)). And in the third inference task, the Question Natural Language Inference, *QNLI*, task  
442 (Rajpurkar et al., 2016, White et al., 2017, Demszky et al., 2018), models are presented with question-answer pairs and asked  
443 to decide whether or not the answer-sentence contains the answer to the question.

444 In order to evaluate model performance on GLUE benchmark tasks, each GLUE dataset was first converted into a format that  
445 is compatible with transformer model input using functionality from the GLUE data processor provided by Huggingface  
446 transformers (<https://huggingface.co/transformers/>). In particular, each set of materials is represented as a matrix that  
447 includes the following dimensions: item (and sentence for multi-sentence materials) ID, ID for each individual word (with  
448 reference to the vocabulary used by the transformer models), the label (e.g., grammatical vs. ungrammatical), and the  
449 'attention mask' which specifies which part(s) of the sentences the model should pay attention to (e.g., some 'padding' is  
450 commonly used to equalize the lengths of sentences/items to the target length of 128 tokens (again constrained by  
451 computational cost), and the attention mask is set to include only the actual words in the materials, and not the padding, and  
452 in some models to further constrain which parts of the input to attend to—e.g., in GPT2 models, the rightward context is  
453 ignored). Next, each GLUE dataset was then fed into each model to obtain a sequence of hidden states at the output of the  
454 last layer of the model. Following default settings from Huggingface transformers, from these hidden states, we then  
455 extracted the token of interest: for bidirectional models such as BERT, this was the first input token—a special token ([cls])  
456 that is appended to each item and designed for sequence classification tasks, and for unidirectional models such as GPT-2,  
457 XLNet or CTRL, this token corresponded to the last attended token (e.g., the last word/word-part in the sentence). In order  
458 to ensure a fair comparison between the models and to avoid the skewing of representations by individual task pre-training,  
459 dense linear pooling projection layers (specific to some transformer) are disregarded. Finally, we fit a linear decoder from the  
460 features of the extracted tokens of interest to the task label(s). For tasks with two or more labels, a cross-entropy loss function  
461 is used; for the task that uses a rating scale, the decoder is trained with a mean-square error (MSE) loss function. Similar to  
462 the next-word prediction task, the linear weights are updated with the AdamW optimizer and a learning rate of 5e-5 in batches  
463 of 8 blocks until convergence as defined on the validation set. Importantly, and also similar to the next-word-prediction task,  
464 we only trained weights of a readout decoder, *not* the weights of models themselves, in order to maintain the same model  
465 representations that we used in model-to-brain and model-to-behavior comparisons. To account for potential bias in the  
466 GLUE datasets, multiple metrics within tasks, as well as different metrics across tasks are reported in the GLUE benchmark.  
467 Following standards in the field, we follow GLUE evaluation metrics [27] and report the final task score as accuracy for *SST-2*,  
468 *MNLI*, *RTE*, and *QNLI*, Matthew's Correlation for *CoLA*, the average of accuracy and F1 score for *MRPC*, and *QQP*, and the

469 average of Pearson and Spearman correlation for *STS-B*. The results are shown in Fig. S5. None of the tasks significantly  
 470 predicted neural scores, suggesting that next-word prediction may be special in its ability to predict brain-like processing. As  
 471 with language modeling, we were unable to evaluate T5-11b on these benchmarks due to lack of computational resources.

472

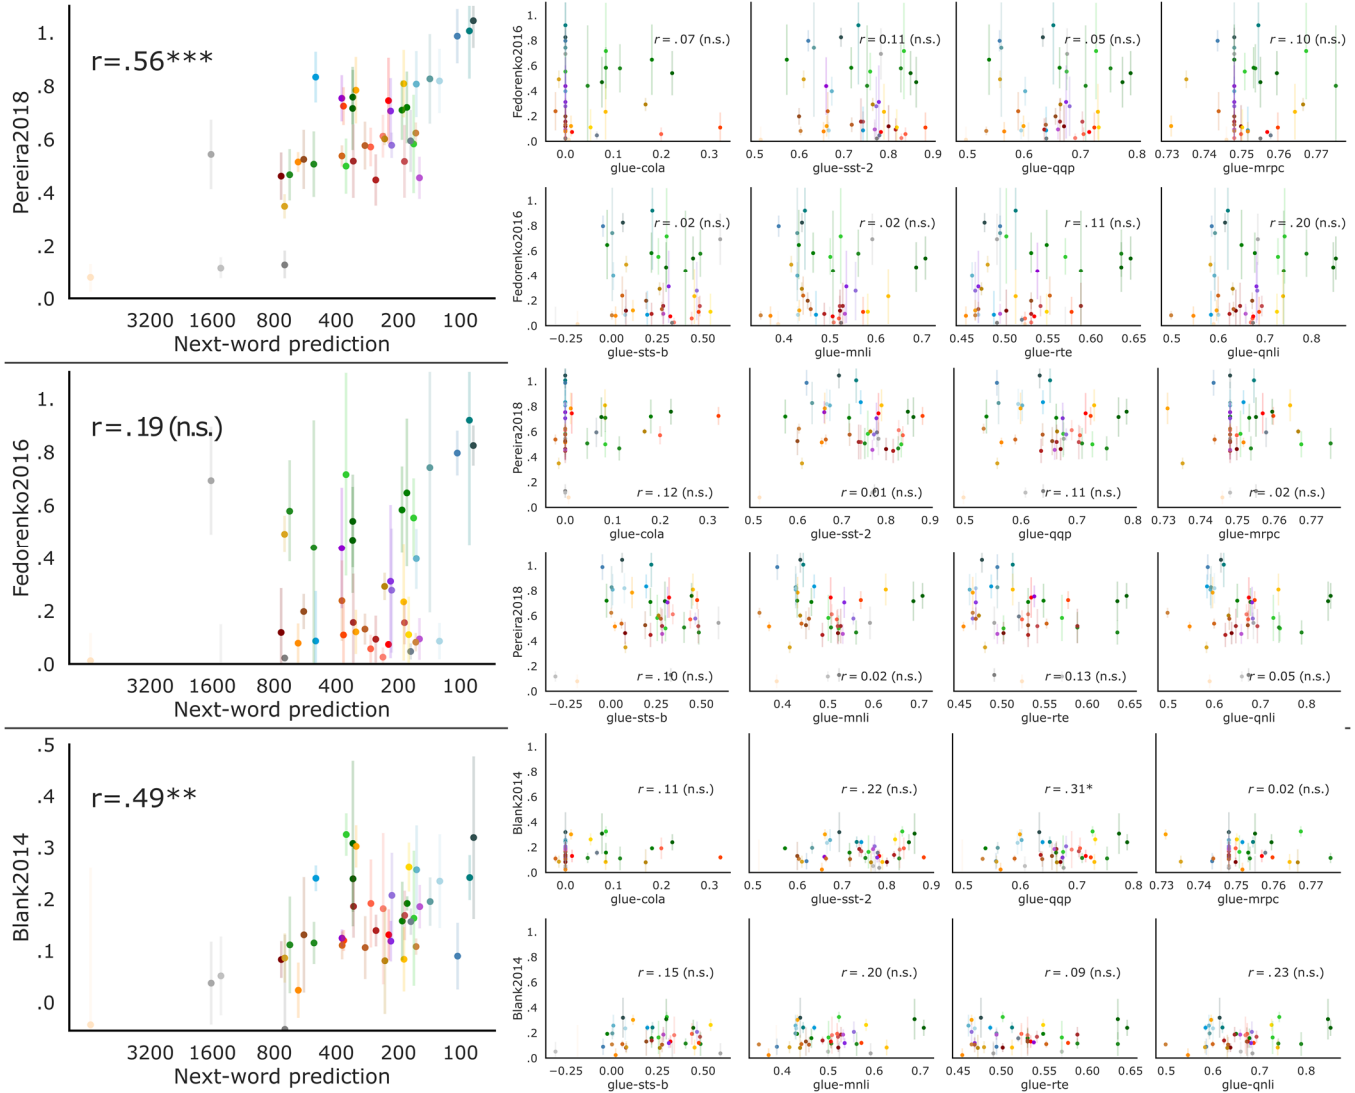

473

474 **Figure S4: Performance on next-word prediction selectively predicts model-to-brain fit.** Performance on GLUE tasks was  
 475 evaluated as described in SI-5. Only the next-word prediction correlations but none of the GLUE correlations were significant.

476

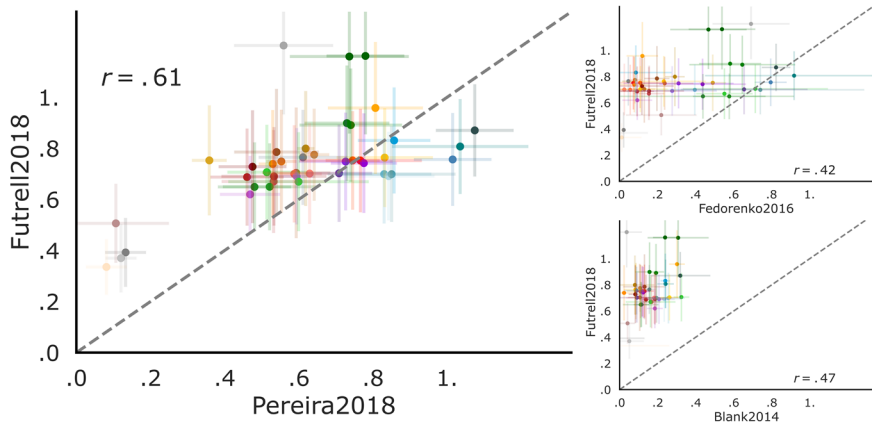

477

478 **Figure S5: Models' neural predictivity for each dataset is correlated with behavioral predictivity.** In Fig. 4b, we showed that  
 479 the models' neural predictivity (averaged across the three neural datasets: Pereira2018, Fedorenko2016, Blank2014)  
 480 correlates with behavioral predictivity. Here, we show that this relationship also holds for each neural dataset individually:  
 481 Pereira2018:  $p < 0.0001$ , Fedorenko2016:  $p < 0.01$ , Blank2014:  $p < 0.01$ .

482

483

484

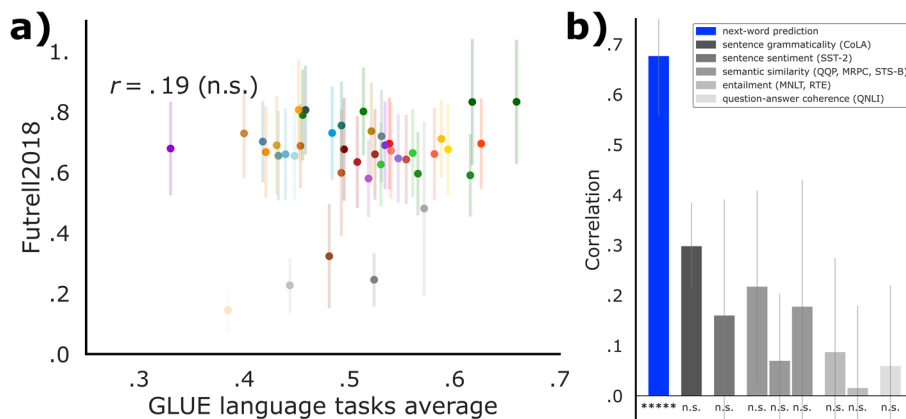

485

486 **Figure S6: Performance on GLUE tasks does not predict model-to-behavior fit.** In Fig. 4c, we showed a significant positive  
 487 correlation of next-word prediction performance with predictivity on behavioral reading times. Here we test whether  
 488 performance on GLUE tasks predicts behavioral scores (performance on GLUE tasks was evaluated as described in SI-5). Only  
 489 the next-word prediction correlations but none of the GLUE correlations were significant. Notations as in Figure 3 for the  
 490 GLUE average (a) and individual tasks (b).

491

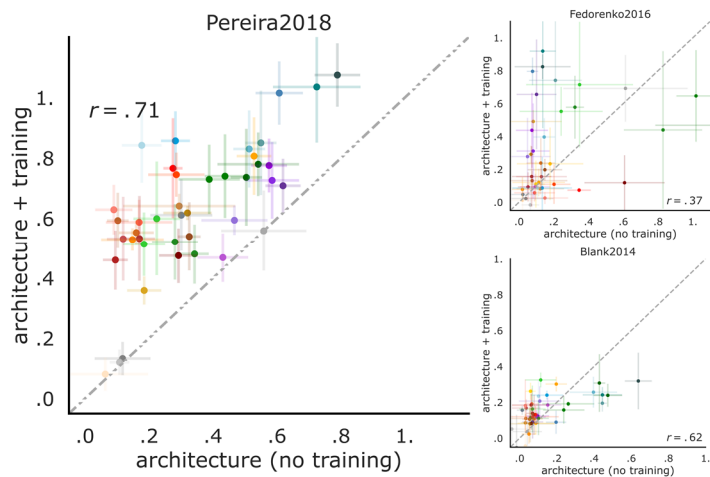

492

493 **Figure S7: Model architecture contributes to brain predictivity and untrained performance predicts trained performance.**  
 494 In Fig. 5, we showed that untrained models already achieve robust brain predictivity (averaged across the three neural and  
 495 one behavioral datasets). Here, we show that this relationship also holds for each dataset individually: Pereira2018:  
 496  $p < 0.00001$ , Fedorenko2016:  $p < 0.05$ , Blank2014:  $p < 0.00001$ .

497



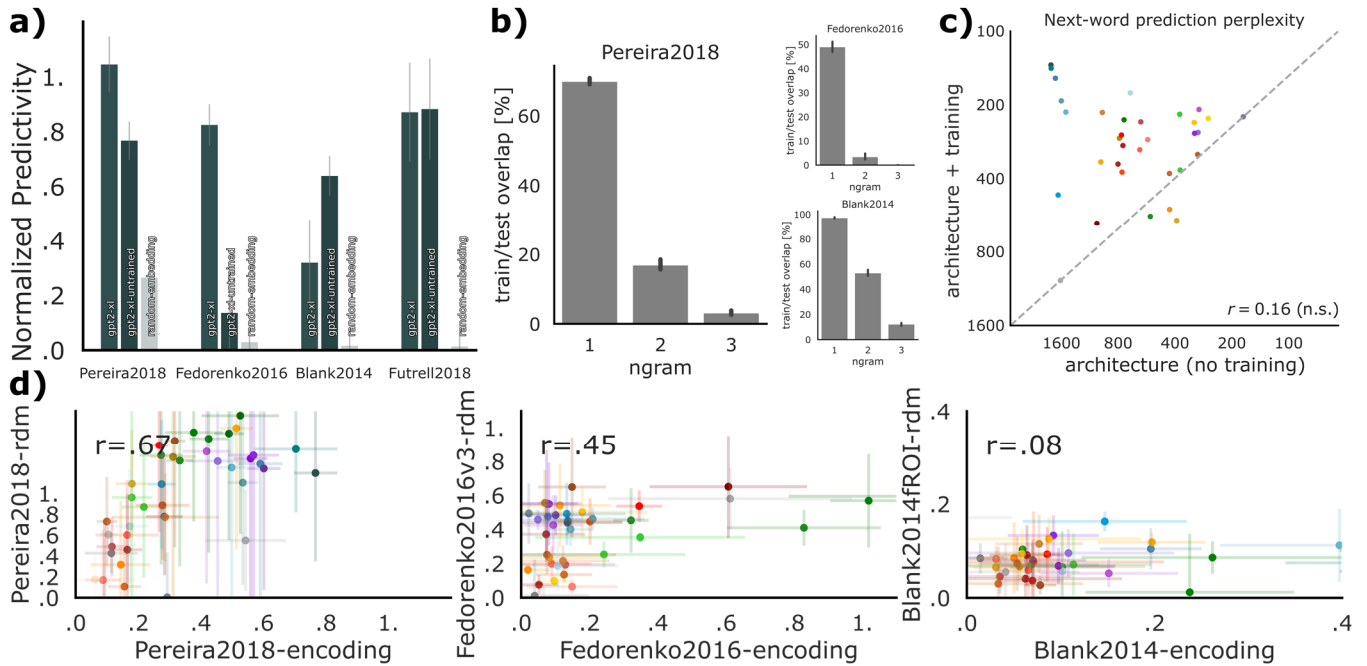

498

499 Figure S8: **Controls for untrained models.** **a)** Neural and behavioral scores of GPT2-xl, the best-performing model, with vs.  
 500 without training, and of a random embedding of the same size. A large feature size alone is not sufficient: a random  
 501 embedding matched in size to GPT2-xl scores worse than untrained GPT2-xl in all four datasets (3 neural, and 1 behavioral).  
 502 These results suggest that model architecture critically contributes to model-to-brain and model-to-behavior fits. **b)** Overlap  
 503 of bi- and tri-grams in train/test stimuli splits of benchmarks is minimal, and despite single-word overlap memorization of  
 504 per-word responses is insufficient (a). **c)** The relationship between model performance with vs. without training on the  
 505 wikitext-2 next-word-prediction task. Consistent with model performance with vs. without training on neural and behavioral  
 506 datasets (Fig. 5), untrained models perform reasonably well. Training improves scores by 80% on average, and most  
 507 prominently for GPT models, in teal (where the quality of the training data is optimized; see [Computational models](#) in  
 508 [Methods](#)). GPT's poor performance on next-word prediction might be explained by very high representational similarities  
 509 across words pre-training in its last layer [38]. **d)** Scores for untrained models obtained via linear predictivity generalize to  
 510 scores obtained via RDM correlations. The RDM metric does not use any fitting. Correlations for untrained models' scores  
 511 between the predictivity and the RDM metric are: Pereira2018  $r = .67$ ,  $p < 0.000005$ ; Fedorenko2016  $r = .45$ ,  $p < .005$ ; Blank2014  
 512  $r = .08$ , n.s. See Fig. S2 for details on the RDM metric.

513

514

### 515 **SI-3 – Effects of model architecture and training on neural and behavioral scores**

516

517 The 43 language models included in the current study span three major types of architecture: embedding models, recurrent  
518 models, and attention-based transformer architectures. However, in addition to this coarse distinction, the individual models  
519 vary widely in diverse architectural and training features. A rigorous examination of the effects of different model features  
520 on model-to-brain/behavior fit would require careful pairwise comparisons of minimally different models, which is not  
521 possible for ‘off-the-shelf’ models without extremely expensive re-training from scratch under many/all possible  
522 combinations of architecture, training diet, optimization objective, and other hyper-parameters. However, we here undertook  
523 a preliminary exploratory investigation. In particular, for a subset of model features (Table SI-9), we computed a Pearson  
524 correlation between the feature values and the averaged model score across all four datasets (3 neural, and 1 behavioral).  
525 We included five architectural features. Three features were continuous: i) number of hidden layers, which varied between 1  
526 and 48 (mean 16.02, std. dev. 11.02); ii) number of features (units across considered layers), which varied between 300 and  
527 78,400 (mean 20,971.26, std. dev. 18,362.91); and iii) the size of the embedding layer, which varied between 128 and 48,000  
528 (mean 872.28, std. dev. 744.33). And the remaining two features were binary: iv) uni- vs. bi-directionality (32/43 models were  
529 bi-directional), and v) the presence of recurrence (5/43 models had recurrence). And we included two training-related  
530 features: i) training data size (in GB), which varied between 0.2 and 336 (mean 351.06 std. dev. 726.81); and ii) vocabulary  
531 size, which varied between 30,000 and 3,000,000 (mean 223,096.95 std. dev. 561,737.36). All training data numbers were  
532 taken from the original model papers, and if training data was specified in tokens, a conversion rate of 4 bytes per token was  
533 used. We further excluded the multilingual XLM and BERT models when examining the effect of training data size, because  
534 those numbers could not be confidently verified. For comparison, we also included performance on the next-word-prediction  
535 task that we examined in the main text.

536

537 The results are shown in Fig. S10. As expected—given the results reported in the main text for the individual datasets (Fig. 3,  
538 4c)—next-word prediction performance robustly predicts model-to-brain/behavior fit ( $r = 0.49$ ,  $p < 0.01$ ). These results  
539 suggest that optimizing for predictive representations may be a critical shared feature of biological and artificial neural  
540 networks for language. How do architectural and training-related features compare to next-word-prediction task  
541 performance in their effect on neural/behavioral predictivity? Two architectural size features are most correlated with model  
542 performance: number of hidden layers ( $r = 0.56$ ,  $p < 0.001$ ), and number of features ( $r = 0.68$ ,  $p < 0.0001$ ). This is expected  
543 given that the most recent models with the highest performance on linguistic tasks are also the largest ones that researchers  
544 are able to run on modern hardware. The two training-related features—training data size and vocabulary size—are  
545 significantly *negatively* correlated with model performance. To rule out the possibility that the negative effect of training-  
546 related features is driven by models with relatively small training datasets and vocabulary size (e.g., ETM; Table S11) that have  
547 low brain/behavior predictivity, we ran an additional analysis considering only transformer models ( $n=38$ ): even in these  
548 generally highly predictive models, more training data ( $r = -0.29$ ,  $p = 0.11$  [not plotted]) or larger vocabulary size ( $r = -0.21$ ,  $p$   
549  $= 0.25$  [not plotted]) do not appear to be beneficial, although the negative correlations are non-significant.

550

551 Does the collection of model designs investigated in this paper inform the hyperparameters that should be optimized for in  
552 any new model to achieve high predictivity? To provide a preliminary answer to this question, we performed an exploratory  
553 analysis in the form of stepwise forward model selection and examined (a) the most parsimonious model that explains the  
554 data, and (b) how much variance the selected features explain cumulatively (Fig. S10b). High overall explained variance  
555 indicates that the combination of features selected by the model is predictive of model performance, whereas low overall  
556 explained variance indicates that crucial predictive hyperparameters are still being neglected. In the forward regression  
557 analysis, we add predictors based on the highest  $R^2$ -adjusted value of the new model, as long as variance increases by adding  
558 a new factor. This analysis revealed that adding training dataset size and recurrence does not lead to variance increase.  
559 Significance markers indicate the p-value for significance of adding each term, and for each regression step we plot the added  
560 explained variance (in  $R^2$ -adjusted) of the variable chosen by the model. The overall cumulative  $R^2$ -adjusted value of the  
561 selected model is 0.822.

562

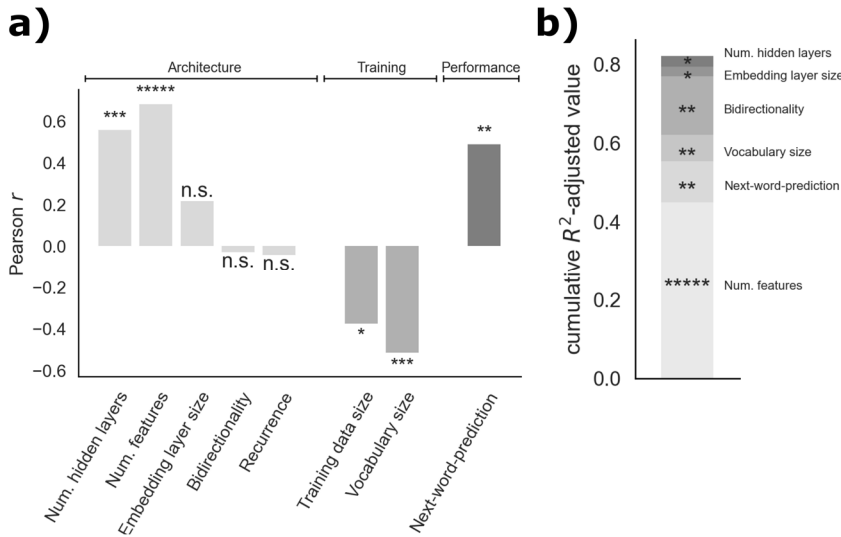

563

564 **Figure S9: Effects of model architecture vs. training on neural and behavioral scores.** **a)** We compared the effects on neural  
565 and behavioral scores (the averaged model score across all four datasets) of three kinds of features: (i) architectural  
566 properties, (ii) training-dependent variables, and, for comparison, (iii) performance on the next-word-prediction task examined  
567 in the main text (Fig. 3, 4c). **b)** Alternative combination of predictors with stepwise forward regression model. New predictors  
568 are added based on the highest  $R^2$ -adjusted value of the new model, as long as variance increases by adding a new factor  
569 (thus excluding training dataset size and recurrence). Significance markers indicate the p-value for significance of adding  
570 model terms. For each regression step, we plot the added explained variance (in  $R^2$ -adjusted) of the variable chosen by the  
571 model. The overall cumulative  $R^2$ -adjusted value of the selected model is 0.822. As in a), the preferred explanatory variable is  
572 the number of features. Stepwise forward regression based on significance leads to the same model-choice. Note that, as  
573 above, t5-11b is excluded for regression based on next-word-prediction, and multilingual models are excluded for regression  
574 on training size.

575

576

577

|    | Model identifier                      | Architecture class | Num. layers | Num. features | Embedding layer size | Bidirectional | Recurrent | Training data size | Vocabulary size | Tokenization               | Training tasks                                                                                                                                |
|----|---------------------------------------|--------------------|-------------|---------------|----------------------|---------------|-----------|--------------------|-----------------|----------------------------|-----------------------------------------------------------------------------------------------------------------------------------------------|
| 1  | glove                                 | Embedding          | 1           | 300           | 300                  | 0             | 0         | 3360               | 2200000         | Stanford tokenizer         | Learning word vectors such that their dot product equals the logarithm of the words' probability of co-occurrence                             |
| 2  | ETM                                   | Embedding          | 1           | 300           | 300                  | 0             | 0         | 0.2                | 52258           | Regex word-level tokenizer | Variational inference topic modeling using embedding representations of both words and topics                                                 |
| 3  | word2vec                              | Embedding          | 1           | 300           | 300                  | 0             | 0         | 400                | 3000000         | Word-level tokenizer       | Predicting a center word from the surrounding context                                                                                         |
| 4  | lstm_lm_1b                            | Recurrent          | 2           | 2048          | 1024                 | 0             | 1         | 4                  | 793471          | bbPE                       | Causal Language Modeling                                                                                                                      |
| 5  | skip-thoughts                         | Recurrent          | 1           | 4800          | 4800                 | 0             | 1         | 3                  | 930911          | NLTK tokenizer             | Predicting words in neighboring sentences                                                                                                     |
| 6  | distilbert-base-uncased               | Bidir. transf.     | 6           | 5376          | 768                  | 1             | 0         | 13                 | 30522           | WordPiece                  | Masked Language Modeling<br>Next-Sentence Prediction                                                                                          |
| 7  | bert-base-uncased                     | Bidir. transf.     | 12          | 9984          | 768                  | 1             | 0         | 13                 | 30522           | WordPiece                  |                                                                                                                                               |
| 8  | bert-base-multilingual-cased          | Bidir. transf.     | 12          | 9984          | 768                  | 1             | 0         | n.a.               | 119547          | WordPiece                  |                                                                                                                                               |
| 9  | bert-large-uncased                    | Bidir. transf.     | 24          | 25600         | 1024                 | 1             | 0         | 13                 | 30522           | WordPiece                  |                                                                                                                                               |
| 10 | bert-large-uncased-whole-word-masking | Bidir. transf.     | 24          | 25600         | 1024                 | 1             | 0         | 13                 | 30522           | WordPiece                  |                                                                                                                                               |
| 11 | distilroberta-base                    | Bidir. transf.     | 6           | 5376          | 768                  | 1             | 0         | 161                | 50265           | bbPE                       | dynamic Masked Language Modeling                                                                                                              |
| 12 | roberta-base                          | Bidir. transf.     | 12          | 9984          | 768                  | 1             | 0         | 161                | 50265           | bbPE                       |                                                                                                                                               |
| 13 | roberta-large                         | Bidir. transf.     | 24          | 25600         | 1024                 | 1             | 0         | 161                | 50265           | bbPE                       |                                                                                                                                               |
| 14 | xlm-mlm-enfr-1024                     | Bidir. transf.     | 6           | 7168          | 1024                 | 1             | 0         | n.a.               | 64139           | BPE                        | multilingual Masked Language Modeling                                                                                                         |
| 15 | xlm-mlm-enfr-1024                     | Bidir. transf.     | 6           | 7168          | 1024                 | 1             | 0         | n.a.               | 64139           | BPE                        | multilingual Causal Language Modeling                                                                                                         |
| 16 | xlm-mlm-xnli15-1024                   | Bidir. transf.     | 12          | 13312         | 1024                 | 1             | 0         | n.a.               | 95000           | BPE                        | multilingual Masked Language Modeling                                                                                                         |
| 17 | xlm-mlm-100-1280                      | Bidir. transf.     | 16          | 21760         | 1280                 | 1             | 0         | n.a.               | 200000          | BPE                        |                                                                                                                                               |
| 18 | xlm-mlm-en-2048                       | Bidir. transf.     | 12          | 26624         | 2048                 | 1             | 0         | 16                 | 30145           | BPE                        | Masked Language Modeling                                                                                                                      |
| 19 | xlm-roberta-base                      | Bidir. transf.     | 12          | 9984          | 768                  | 1             | 0         | 2500               | 250002          | SentencePiece              | multilingual Masked Language Modeling                                                                                                         |
| 20 | xlm-roberta-large                     | Bidir. transf.     | 25          | 25600         | 1024                 | 1             | 0         | 2500               | 250002          | SentencePiece              |                                                                                                                                               |
| 21 | transfo-xl-wt103                      | Bidir. transf.     | 18          | 19456         | 1024                 | 1             | 1         | 0.4                | 267735          | Word-level tokenizer       | Causal Language Modeling                                                                                                                      |
| 22 | xlnet-base-cased                      | Bidir. transf.     | 12          | 9984          | 768                  | 1             | 1         | 126                | 32000           | SentencePiece              | Permutation Language Modeling                                                                                                                 |
| 23 | xlnet-large-cased                     | Bidir. transf.     | 24          | 25600         | 1024                 | 1             | 1         | 126                | 32000           | SentencePiece              |                                                                                                                                               |
| 24 | ctrl                                  | Bidir. transf.     | 48          | 62720         | 1280                 | 1             | 0         | 140                | 246534          | BPE                        | Causal Language Modeling                                                                                                                      |
| 25 | t5-small                              | Bidir. transf.     | 6           | 3584          | 512                  | 1             | 0         | 862                | 32128           | SentencePiece              | Text-to-text training on a variety of tasks (i.e., prediction of multiple corrupted tokens, and tasks from the GLUE and SuperGLUE benchmarks) |
| 26 | t5-base                               | Bidir. transf.     | 12          | 9984          | 768                  | 1             | 0         | 862                | 32128           | SentencePiece              |                                                                                                                                               |
| 27 | t5-large                              | Bidir. transf.     | 24          | 25600         | 1024                 | 1             | 0         | 862                | 32128           | SentencePiece              |                                                                                                                                               |
| 28 | t5-3b                                 | Bidir. transf.     | 24          | 25600         | 1024                 | 1             | 0         | 862                | 32128           | SentencePiece              |                                                                                                                                               |
| 29 | t5-11b                                | Bidir. transf.     | 24          | 25600         | 1024                 | 1             | 0         | 862                | 32128           | SentencePiece              |                                                                                                                                               |
| 30 | albert-base-v1                        | Bidir. transf.     | 12          | 9984          | 128                  | 1             | 0         | 16                 | 30000           | SentencePiece              |                                                                                                                                               |
| 31 | albert-base-v2                        | Bidir. transf.     | 12          | 9984          | 128                  | 1             | 0         | 16                 | 30000           | SentencePiece              | Masked Language Modeling<br>Sentence-Order Prediction                                                                                         |
| 32 | albert-large-v1                       | Bidir. transf.     | 24          | 25600         | 128                  | 1             | 0         | 16                 | 30000           | SentencePiece              |                                                                                                                                               |
| 33 | albert-large-v2                       | Bidir. transf.     | 24          | 25600         | 128                  | 1             | 0         | 16                 | 30000           | SentencePiece              |                                                                                                                                               |
| 34 | albert-xlarge-v1                      | Bidir. transf.     | 24          | 51200         | 128                  | 1             | 0         | 16                 | 30000           | SentencePiece              |                                                                                                                                               |
| 35 | albert-xlarge-v2                      | Bidir. transf.     | 24          | 51200         | 128                  | 1             | 0         | 16                 | 30000           | SentencePiece              |                                                                                                                                               |
| 36 | albert-xxlarge-v1                     | Bidir. transf.     | 12          | 53248         | 128                  | 1             | 0         | 16                 | 30000           | SentencePiece              |                                                                                                                                               |
| 37 | albert-xxlarge-v2                     | Bidir. transf.     | 12          | 53248         | 128                  | 1             | 0         | 16                 | 30000           | SentencePiece              |                                                                                                                                               |
| 38 | openai-gpt                            | Unidir. transf.    | 12          | 9984          | 768                  | 0             | 0         | 3                  | 40478           | BPE                        | Causal Language Modeling                                                                                                                      |
| 39 | distilgpt2                            | Unidir. transf.    | 6           | 5376          | 768                  | 0             | 0         | 40                 | 50257           | bbPE                       | Causal Language Modeling                                                                                                                      |
| 40 | gpt2                                  | Unidir. transf.    | 12          | 9984          | 768                  | 0             | 0         | 40                 | 50257           | bbPE                       |                                                                                                                                               |
| 41 | gpt2-medium                           | Unidir. transf.    | 24          | 25600         | 1024                 | 0             | 0         | 40                 | 50257           | bbPE                       |                                                                                                                                               |
| 42 | gpt2-large                            | Unidir. transf.    | 36          | 47360         | 1280                 | 0             | 0         | 40                 | 50257           | bbPE                       |                                                                                                                                               |
| 43 | gpt2-xl                               | Unidir. transf.    | 48          | 78400         | 1600                 | 0             | 0         | 40                 | 50257           | bbPE                       |                                                                                                                                               |

578  
579  
580  
581

Table S1: Overview of model designs.

Distribution of Layer Preference Across Language Voxels  
GPT2-xl, All Participants (n=10)

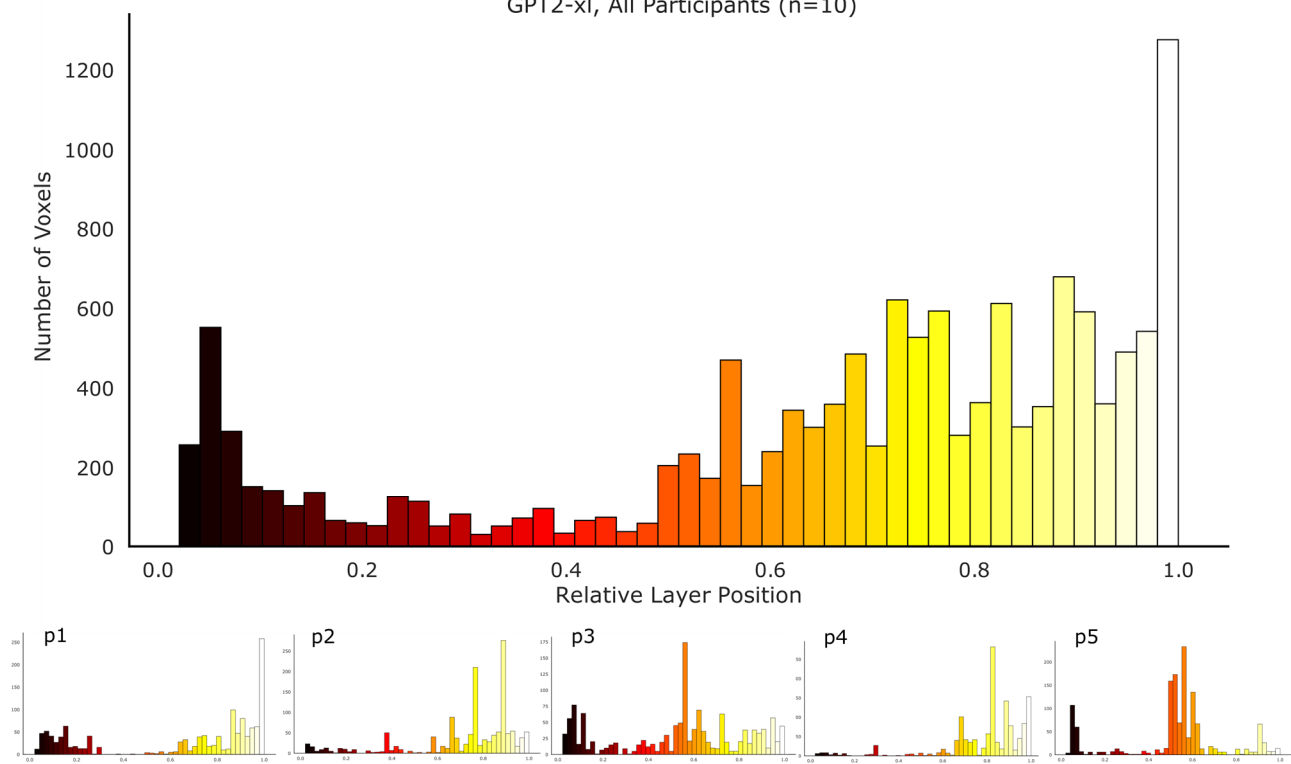

582

583 Figure S10: **Distribution of layer preference (best performing layer) per voxel for GPT2-xl for Pereira2018.** A per-voxel per-  
 584 participant raw predictivity value (as opposed to *overall* ceiled predictivity scores in Fig. 2c) was obtained in the language  
 585 network by computing the mean over cross-validation splits and experiments. For each voxel, the layer with the highest  
 586 predictivity value was estimated as the “preferred” layer (argmax over layer scores). As in the main analyses, the voxels in the  
 587 language network were included. Zero on the x-axis corresponds to the embedding layer of the model. The upper plot is  
 588 averaged across all participants in *Pereira2018* (n=10). The lower panel shows the participant-wise layer preference for five  
 589 representative participants. Across participants, most voxels show the highest predictivity value for later layers of GPT2-xl.  
 590 Within participants, the layer preference across voxels varies but is often clustered around particular layers. Investigations of  
 591 how predictivity fluctuates across model layers, and/or between the language network and other parts of the brain, is left for  
 592 future work.

593

594

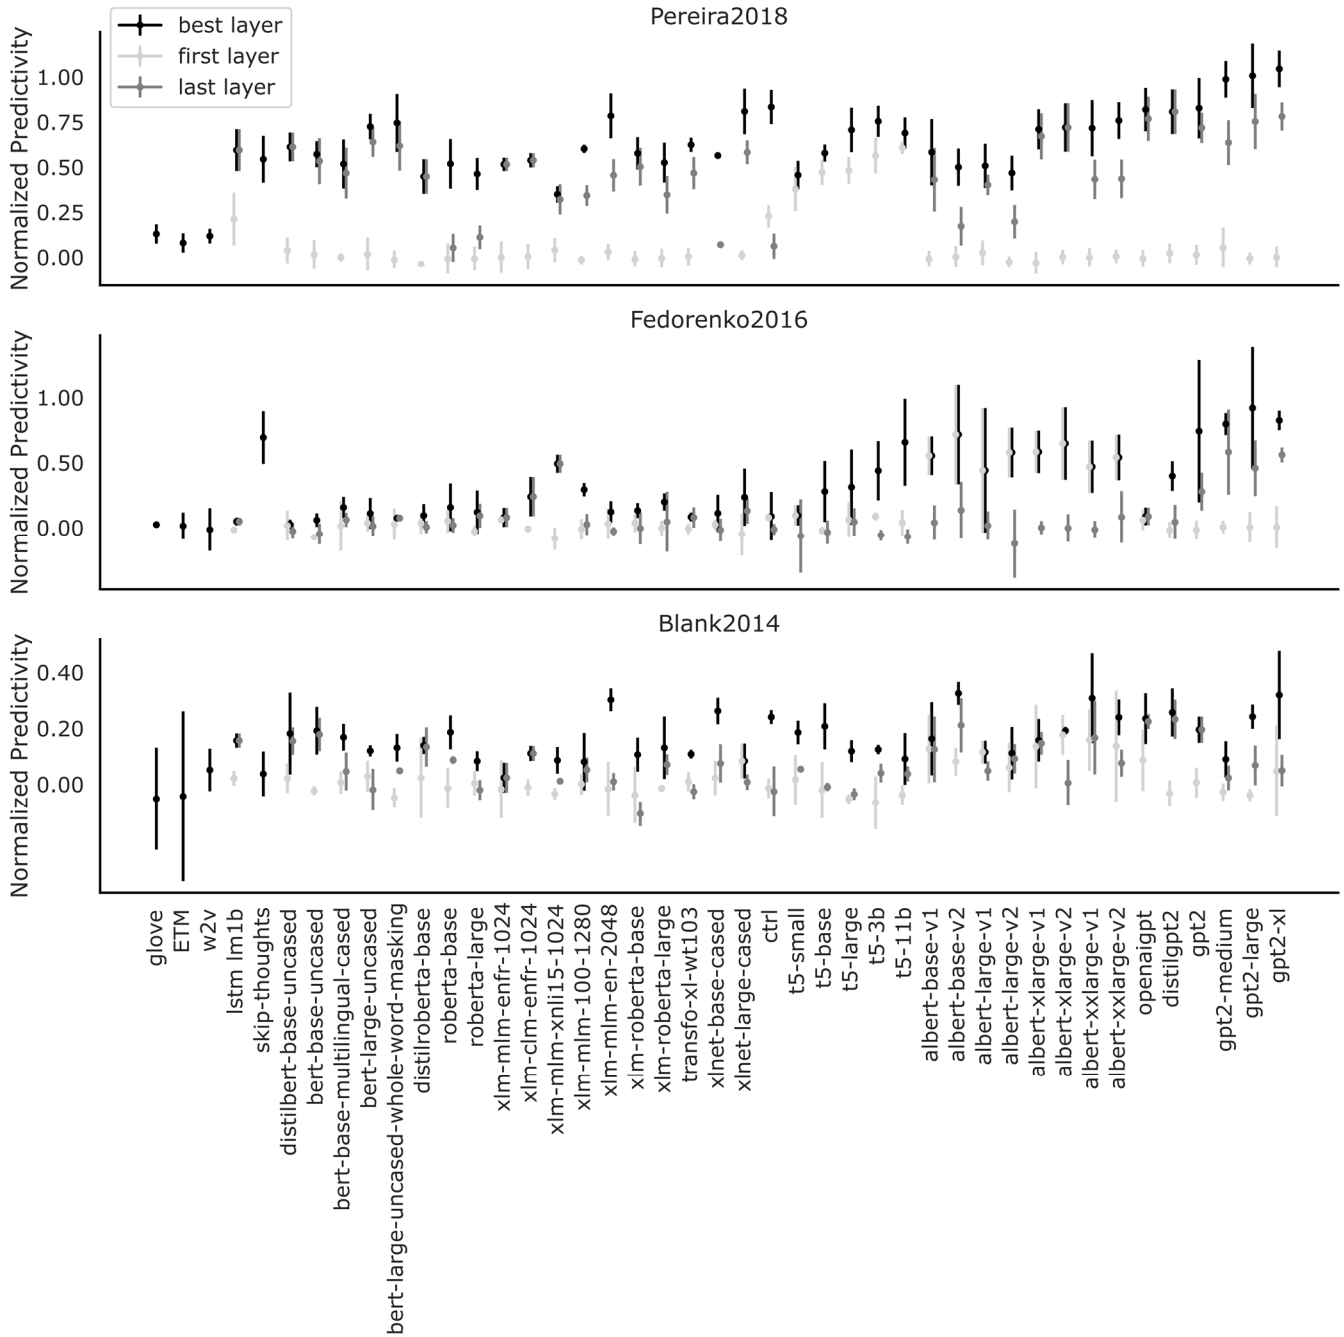

595  
596

597 **Figure S11: Brain scores of each model's best, first, and last layer.** To test the importance of intermediate representations,  
598 we directly compared layer performances at the beginning and end of each model with the model's best-performing layer. In  
599 nearly all networks with multiple layers, both the token embedding (first layer) as well as the task-specific output (last layer)  
600 underperform significantly compared to the respective best layer. This suggests that the combination of architecture and  
601 weights in the networks is a major driver for brain-like representations, beyond potential semantic information that is already  
602 present in the model input codes. Lexical similarity determined by optimizing for next-word prediction present in the output  
603 layer is also not sufficient, instead pointing to intermediate representations as the most predictive (see also Fig. 2c).

604  
605  
606

607  
608  
609  
610  
611  
612  
613  
614  
615  
616  
617  
618  
619  
620  
621  
622  
623  
624  
625  
626  
627  
628  
629  
630  
631  
632  
633  
634  
635  
636  
637  
638  
639  
640  
641  
642  
643  
644  
645  
646  
647  
648  
649  
650  
651  
652  
653  
654  
655  
656  
657  
658

## SI References

- [1] A. Bautista and S. M. Wilson, "Neural responses to grammatically and lexically degraded speech," *Lang. Cogn. Neurosci.*, vol. 31, no. 4, pp. 567–574, Apr. 2016, doi: 10.1080/23273798.2015.1123281.
- [2] I. Blank, Z. Balewski, K. Mahowald, and E. Fedorenko, "Syntactic processing is distributed across the language system," *Neuroimage*, vol. 127, pp. 307–323, Feb. 2016, doi: 10.1016/j.neuroimage.2015.11.069.
- [3] E. Fedorenko, P. J. Hsieh, A. Nieto-Castañón, S. Whitfield-Gabrieli, and N. Kanwisher, "New method for fMRI investigations of language: Defining ROIs functionally in individual subjects," *J. Neurophysiol.*, vol. 104, no. 2, pp. 1177–1194, Aug. 2010, doi: 10.1152/jn.00032.2010.
- [4] E. Fedorenko, A. Nieto-Castañón, and N. Kanwisher, "Lexical and syntactic representations in the brain: An fMRI investigation with multi-voxel pattern analyses," *Neuropsychologia*, vol. 50, no. 4, pp. 499–513, Mar. 2012, doi: 10.1016/j.neuropsychologia.2011.09.014.
- [5] E. Fedorenko *et al.*, "Neural correlate of the construction of sentence meaning," *Proc. Natl. Acad. Sci. United States Am.*, vol. 113, no. 41, pp. E6256–E6262, Oct. 2016, doi: 10.1073/pnas.1612132113.
- [6] E. Fedorenko, I. Blank, M. Siegelman, and Z. Mineroff, "Lack of selectivity for syntax relative to word meanings throughout the language network," *bioRxiv Prepr.*, 2020, doi: 10.1101/477851.
- [7] I. A. Blank and E. Fedorenko, "No evidence for differences among language regions in their temporal receptive windows," *Neuroimage*, vol. 219, p. 116925, Oct. 2020, doi: 10.1016/j.neuroimage.2020.116925.
- [8] G. Buzsáki, C. A. Anastassiou, and C. Koch, "The origin of extracellular fields and currents—EEG, ECoG, LFP and spikes," *Nat. Rev. Neurosci.*, vol. 13, no. 6, pp. 407–420, Jun. 2012, doi: 10.1038/nrn3241.
- [9] S. Lawrence Marple, "Computing the discrete-time analytic signal via fft," *IEEE Trans. Signal Process.*, vol. 47, no. 9, pp. 2600–2603, Sep. 1999, doi: 10.1109/78.782222.
- [10] M. A. Just, P. A. Carpenter, and J. D. Woolley, "Paradigms and processes in reading comprehension," *J. Exp. Psychol. Gen.*, vol. 111, no. 2, pp. 228–238, Jun. 1982, doi: 10.1037/0096-3445.111.2.228.
- [11] J. Pennington, R. Socher, and C. D. Manning, "Glove: Global Vectors for Word Representation," in *Proceedings of the 2014 Conference on Empirical Methods in Natural Language Processing (EMNLP)*, 2014, pp. 1532–1543, doi: 10.3115/v1/D14-1162.
- [12] A. B. Dieng, F. J. R. Ruiz, and D. M. Blei, "Topic Modeling in Embedding Spaces," *arXiv Prepr.*, Jul. 2019, Accessed: Jun. 15, 2020. [Online]. Available: <http://arxiv.org/abs/1907.04907>.
- [13] T. Mikolov, I. Sutskever, K. Chen, G. Corrado, and J. Dean, "Distributed representations of words and phrases and their compositionality," Oct. 2013, Accessed: Jun. 15, 2020. [Online]. Available: <http://arxiv.org/abs/1310.4546>.
- [14] R. Jozefowicz, O. Vinyals, M. Schuster, N. Shazeer, and Y. Wu, "Exploring the Limits of Language Modeling," Feb. 2016, Accessed: Nov. 15, 2018. [Online]. Available: <http://arxiv.org/abs/1602.02410>.
- [15] C. Chelba *et al.*, "One billion word benchmark for measuring progress in statistical language modeling," in *Annual Conference of the International Speech Communication Association*, Dec. 2014, pp. 2635–2639, Accessed: Jun. 15, 2020. [Online]. Available: <http://arxiv.org/abs/1312.3005>.
- [16] R. Kiros *et al.*, "Skip-Thought Vectors," in *Neural Information Processing Systems (NIPS)*, 2015, pp. 3294–3302, Accessed: Jul. 09, 2019. [Online]. Available: <http://papers.nips.cc/paper/5950-skip-thought-vectors>.
- [17] T. Wolf *et al.*, "HuggingFace's Transformers: State-of-the-art Natural Language Processing," *arXiv Prepr.*, Oct. 2019, Accessed: Jun. 15, 2020. [Online]. Available: <http://arxiv.org/abs/1910.03771>.
- [18] V. Sanh, L. Debut, J. Chaumond, and T. Wolf, "DistilBERT, a distilled version of BERT: smaller, faster, cheaper and lighter," *arXiv Prepr.*, Oct. 2019, Accessed: Jun. 15, 2020. [Online]. Available: <http://arxiv.org/abs/1910.01108>.
- [19] J. Devlin, M.-W. Chang, K. Lee, and K. Toutanova, "BERT: Pre-training of Deep Bidirectional Transformers for Language Understanding," *arXiv Prepr.*, Oct. 2018, Accessed: Oct. 11, 2018. [Online]. Available: <https://arxiv.org/abs/1810.04805>.
- [20] Y. Liu *et al.*, "RoBERTa: A Robustly Optimized BERT Pretraining Approach," *arXiv Prepr.*, Jul. 2019, Accessed: Jun. 15, 2020. [Online]. Available: <http://arxiv.org/abs/1907.11692>.
- [21] G. Lample and A. Conneau, "Cross-lingual Language Model Pretraining," in *Neural Information Processing Systems (NeurIPS)*, Jan. 2019, pp. 7059–7069, Accessed: May 07, 2020. [Online]. Available: <http://arxiv.org/abs/1901.07291>.
- [22] A. Conneau *et al.*, "Unsupervised Cross-lingual Representation Learning at Scale," *arXiv Prepr.*, Nov. 2019, Accessed: Jun. 15, 2020. [Online]. Available: <http://arxiv.org/abs/1911.02116>.
- [23] Z. Dai, Z. Yang, Y. Yang, J. Carbonell, Q. V. Le, and R. Salakhutdinov, "Transformer-XL: Attentive language models beyond a fixed-length context," in *Association for Computational Linguistics (ACL)*, Jan. 2020, pp. 2978–2988, doi:

- 659 10.18653/v1/p19-1285.
- 660 [24] Z. Yang, Z. Dai, Y. Yang, J. Carbonell, R. Salakhutdinov, and Q. V. Le, “XLNet: Generalized Autoregressive Pretraining  
661 for Language Understanding,” *arXiv Prepr.*, Jun. 2019, Accessed: Jul. 09, 2019. [Online]. Available:  
662 <http://arxiv.org/abs/1906.08237>.
- 663 [25] N. S. Keskar, B. McCann, L. R. Varshney, C. Xiong, and R. Socher, “CTRL: A Conditional Transformer Language Model  
664 for Controllable Generation,” *arXiv Prepr.*, Sep. 2019, Accessed: Jun. 15, 2020. [Online]. Available:  
665 <http://arxiv.org/abs/1909.05858>.
- 666 [26] C. Raffel *et al.*, “Exploring the Limits of Transfer Learning with a Unified Text-to-Text Transformer,” *arXiv Prepr.*, Oct.  
667 2019, Accessed: May 07, 2020. [Online]. Available: <http://arxiv.org/abs/1910.10683>.
- 668 [27] A. Wang, A. Singh, J. Michael, F. Hill, O. Levy, and S. R. Bowman, “Glue: A multi-task benchmark and analysis platform  
669 for natural language understanding,” Sep. 2019, Accessed: May 21, 2020. [Online]. Available:  
670 <http://arxiv.org/abs/1804.07461>.
- 671 [28] A. Wang *et al.*, “SuperGLUE: A Stickier Benchmark for General-Purpose Language Understanding Systems,” in *Neural  
672 Information Processing Systems (NeurIPS)*, 2019, pp. 3266–3280, Accessed: Jun. 15, 2020. [Online]. Available:  
673 <http://arxiv.org/abs/1905.00537>.
- 674 [29] Z. Lan, M. Chen, S. Goodman, K. Gimpel, P. Sharma, and R. Soricut, “ALBERT: A Lite BERT for Self-supervised Learning  
675 of Language Representations,” *arXiv Prepr.*, Sep. 2019, Accessed: Jun. 15, 2020. [Online]. Available:  
676 <http://arxiv.org/abs/1909.11942>.
- 677 [30] A. Radford, K. Narasimhan, T. Salimans, and I. Sutskever, “Improving Language Understanding by Generative Pre-  
678 Training,” 2018. [Online]. Available: <https://gluebenchmark.com/leaderboard>.
- 679 [31] A. Radford, J. Wu, R. Child, D. Luan, D. Amodei, and I. Sutskever, “Language Models are Unsupervised Multitask  
680 Learners,” *arXiv Prepr.*, 2019, [Online]. Available: <https://github.com/codelucas/newspaper>.
- 681 [32] S. Merity, C. Xiong, J. Bradbury, and R. Socher, “Pointer Sentinel Mixture Models,” *arXiv Prepr.*, Sep. 2016, Accessed:  
682 May 22, 2017. [Online]. Available: <http://arxiv.org/abs/1609.07843>.
- 683 [33] N. Kriegeskorte, “Representational similarity analysis – connecting the branches of systems neuroscience,” *Front. Syst.  
684 Neurosci.*, vol. 2, 2008, doi: 10.3389/neuro.06.004.2008.
- 685 [34] I. A. Blank and E. Fedorenko, “Domain-general brain regions do not track linguistic input as closely as language-  
686 selective regions,” *J. Neurosci.*, vol. 37, no. 41, pp. 9999–10011, Oct. 2017, doi: 10.1523/JNEUROSCI.3642-16.2017.
- 687 [35] E. Diachek, I. Blank, M. Siegelman, J. Affourtit, and E. Fedorenko, “The domain-general multiple demand (MD) network  
688 does not support core aspects of language comprehension: A large-scale fMRI investigation,” *J. Neurosci.*, vol. 40, no.  
689 23, pp. 4536–4550, Jun. 2020, doi: 10.1523/JNEUROSCI.2036-19.2020.
- 690 [36] C. Shain, I. A. Blank, M. van Schijndel, W. Schuler, and E. Fedorenko, “fMRI reveals language-specific predictive coding  
691 during naturalistic sentence comprehension,” *Neuropsychologia*, vol. 138, Feb. 2020, doi:  
692 10.1016/j.neuropsychologia.2019.107307.
- 693 [37] L. Wehbe *et al.*, “Incremental language comprehension difficulty predicts activity in the language network but not the  
694 multiple demand network,” *bioRxiv Prepr.*, Apr. 2020, doi: 10.1101/2020.04.15.043844.
- 695 [38] K. Ethayarajh, “How Contextual are Contextualized Word Representations? Comparing the Geometry of BERT, ELMo,  
696 and GPT-2 Embeddings,” in *Empirical Methods in Natural Language Processing (EMNLP)*, Sep. 2019, pp. 55–65,  
697 Accessed: Mar. 10, 2021. [Online]. Available: <http://arxiv.org/abs/1909.00512>.
- 698
